# Supplementary material for: An Autism-Associated Variant of Epac2 Reveals a Role for Ras/Epac2 Signaling in Controlling Basal Dendrite Maintenance in Mice
Source: PubMed Central journal article supplement (PMC3383751; doi:10.1371/journal.pbio.1001350), 2012-06-26
Supplement: pbio.1001350.s001.pdf [file pbio.1001350.s001.pdf]

**A**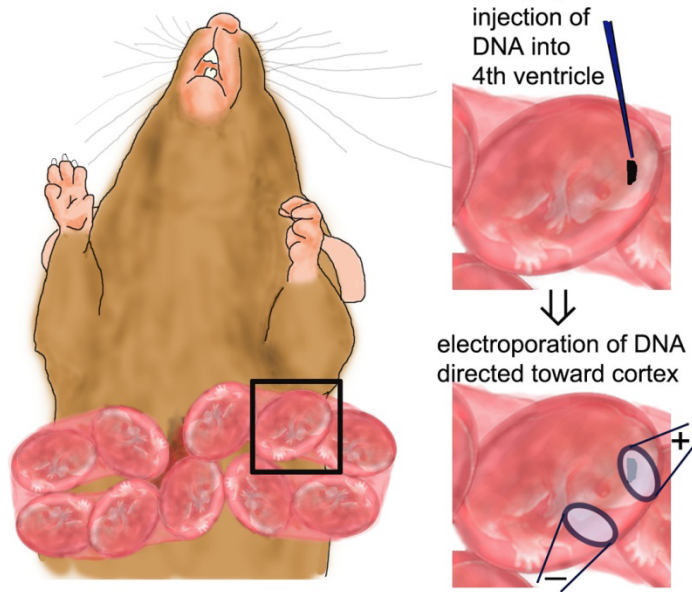**B**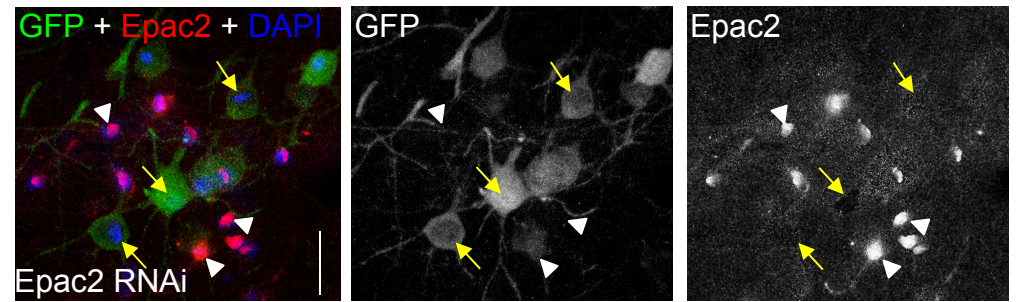**C**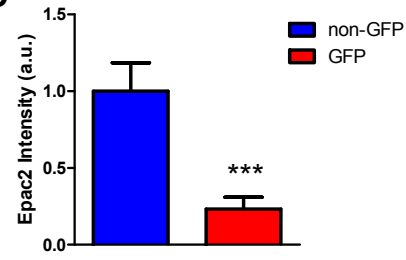

Figure S1
