# Supplementary material for: An Autism-Associated Variant of Epac2 Reveals a Role for Ras/Epac2 Signaling in Controlling Basal Dendrite Maintenance in Mice
Source: PubMed Central journal article supplement (PMC3383751; doi:10.1371/journal.pbio.1001350), 2012-06-26
Supplement: pbio.1001350.s009.pdf [file pbio.1001350.s009.pdf]

Table S2.

| Quantification of apical and basal dendritic branch number in <i>in utero</i> electroporated paired neurons in 300 $\mu$ m sections. |                                               |                               |                                  |                                  |                             |           |                               |                |
|--------------------------------------------------------------------------------------------------------------------------------------|-----------------------------------------------|-------------------------------|----------------------------------|----------------------------------|-----------------------------|-----------|-------------------------------|----------------|
| <u>Individual Paired cell data</u>                                                                                                   | Number of branches per neuron                 |                               |                                  |                                  |                             |           |                               |                |
|                                                                                                                                      | Total branch number                           | Basal                         |                                  |                                  | Total branch number         | Apical    |                               |                |
|                                                                                                                                      |                                               | Number of branches per neuron | Primary                          | Secondary                        |                             | Tertiary  | Number of branches per neuron | Primary        |
| control                                                                                                                              | 45                                            | 4                             | 17                               | 24                               | 37                          | 1         | 8                             | 28             |
| Epac2-RNAi                                                                                                                           | 26                                            | 4                             | 12                               | 12                               | 38                          | 1         | 8                             | 27             |
| control                                                                                                                              | 68                                            | 8                             | 10                               | 50                               | 34                          | 1         | 6                             | 27             |
| Epac2-RNAi                                                                                                                           | 31                                            | 7                             | 8                                | 17                               | 37                          | 1         | 7                             | 28             |
| control                                                                                                                              | 81                                            | 6                             | 28                               | 47                               | 27                          | 1         | 6                             | 20             |
| Epac2-RNAi                                                                                                                           | 50                                            | 5                             | 18                               | 27                               | 37                          | 1         | 9                             | 27             |
| control                                                                                                                              | 56                                            | 4                             | 12                               | 40                               | 37                          | 1         | 5                             | 31             |
| Epac2-RNAi                                                                                                                           | 19                                            | 3                             | 6                                | 12                               | 34                          | 1         | 5                             | 26             |
| control                                                                                                                              | 61                                            | 6                             | 11                               | 44                               | 46                          | 1         | 5                             | 40             |
| Epac2-RNAi                                                                                                                           | 39                                            | 8                             | 10                               | 23                               | 47                          | 1         | 4                             | 40             |
| <u>Combined data</u>                                                                                                                 | Average number of branches (mean $\pm$ s.e.m) |                               |                                  |                                  |                             |           |                               |                |
|                                                                                                                                      | Average total branch number                   | Basal                         |                                  |                                  | Average total branch number | Apical    |                               |                |
|                                                                                                                                      |                                               | Average number of branches    | Primary                          | Secondary                        |                             | Tertiary  | Average number of branches    | Primary        |
| control                                                                                                                              | 62.2 $\pm$ 6.0                                | 5.6 $\pm$ 0.7                 | 15.6 $\pm$ 3.3                   | 41 $\pm$ 4.6                     | 36.2 $\pm$ 3.1              | 1 $\pm$ 0 | 6 $\pm$ 0.5                   | 29.2 $\pm$ 3.2 |
| Epac2-RNAi                                                                                                                           | <b>33 <math>\pm</math> 5.4</b>                | 5.4 $\pm$ 0.9                 | <b>10.8 <math>\pm</math> 2.1</b> | <b>18.2 <math>\pm</math> 2.9</b> | 38.6 $\pm$ 2.2              | 1 $\pm$ 0 | 6.6 $\pm$ 0.9                 | 29.6 $\pm$ 2.6 |
