# Supplementary material for: An Autism-Associated Variant of Epac2 Reveals a Role for Ras/Epac2 Signaling in Controlling Basal Dendrite Maintenance in Mice
Source: PLoS Biol. 2012 Jun 26;10(6):e1001350. doi: 10.1371/journal.pbio.1001350 (PMC3383751; doi:10.1371/journal.pbio.1001350)
Supplement: Table S1 — Quantification of dendritic morphology for apical and basal dendritic branch number and length in in utero electroporated 50 µm sections. (PDF) [file pbio.1001350.s008.pdf]

Table S1.

A

| Quantification of dendrite morphology for apical and basal dendritic branch number in <i>in utero</i> electroporated 50 $\mu$ m sections. |                                                   |               |                                 |                                 |                |                |               |               |
|-------------------------------------------------------------------------------------------------------------------------------------------|---------------------------------------------------|---------------|---------------------------------|---------------------------------|----------------|----------------|---------------|---------------|
| <u>Experimental condition</u>                                                                                                             | Number of branches per neuron (mean $\pm$ s.e.m.) |               |                                 |                                 |                |                |               |               |
|                                                                                                                                           | Basal                                             |               |                                 |                                 | Apical         |                |               |               |
|                                                                                                                                           | Total                                             | Primary       | Secondary                       | Tertiary                        | Total          | Primary        | Secondary     | Tertiary      |
| control                                                                                                                                   | 20.3 $\pm$ 1.4                                    | 5.3 $\pm$ 0.5 | 7.2 $\pm$ 0.6                   | 8.5 $\pm$ 0.7                   | 16.1 $\pm$ 1.6 | 1.1 $\pm$ 0.08 | 6.2 $\pm$ 0.7 | 8.7 $\pm$ 0.7 |
| Epac2-RNAi                                                                                                                                | <b>11.7 <math>\pm</math> 1.04</b>                 | 4.3 $\pm$ 0.4 | <b>5.1 <math>\pm</math> 0.5</b> | <b>2.8 <math>\pm</math> 0.5</b> | 14.0 $\pm$ 0.9 | 1.1 $\pm$ 0.09 | 6.1 $\pm$ 0.3 | 7.9 $\pm$ 0.7 |

B

| Quantification of dendrite morphology for apical and basal dendritic branch length in <i>in utero</i> electroporated 50 $\mu$ m sections. |                                                 |                                  |                                  |                                  |                                   |                                  |                |                |
|-------------------------------------------------------------------------------------------------------------------------------------------|-------------------------------------------------|----------------------------------|----------------------------------|----------------------------------|-----------------------------------|----------------------------------|----------------|----------------|
| <u>Experimental condition</u>                                                                                                             | Dendritic length ( $\mu$ m) (mean $\pm$ s.e.m.) |                                  |                                  |                                  |                                   |                                  |                |                |
|                                                                                                                                           | Basal                                           |                                  |                                  |                                  | Apical                            |                                  |                |                |
|                                                                                                                                           | Total dendritic length ( $\mu$ m)               | Average branch length ( $\mu$ m) |                                  |                                  | Total dendritic length ( $\mu$ m) | Average branch length ( $\mu$ m) |                |                |
|                                                                                                                                           |                                                 | Primary                          | Secondary                        | Tertiary                         |                                   | Primary                          | Secondary      | Tertiary       |
| control                                                                                                                                   | 596.3 $\pm$ 48.2                                | 19.8 $\pm$ 2.8                   | 31.3 $\pm$ 2.6                   | 35.7 $\pm$ 3.8                   | 508.4 $\pm$ 38.5                  | 59.5 $\pm$ 5.0                   | 31.6 $\pm$ 3.1 | 30.8 $\pm$ 2.2 |
| Epac2-RNAi                                                                                                                                | <b>269.9 <math>\pm</math> 20.6</b>              | 22.9 $\pm$ 2.6                   | <b>23.8 <math>\pm</math> 2.4</b> | <b>16.1 <math>\pm</math> 2.2</b> | 484.8 $\pm$ 33.7                  | 67.2 $\pm$ 10.2                  | 40.4 $\pm$ 4.6 | 29.9 $\pm$ 2.2 |
