# Supplementary material for: An Autism-Associated Variant of Epac2 Reveals a Role for Ras/Epac2 Signaling in Controlling Basal Dendrite Maintenance in Mice
Source: PLoS Biol. 2012 Jun 26;10(6):e1001350. doi: 10.1371/journal.pbio.1001350 (PMC3383751; doi:10.1371/journal.pbio.1001350)
Supplement: Table S3 — Quantification of apical and basal dendritic branch length in in utero electroporated paired neurons in 300 µm sections. (PDF) [file pbio.1001350.s010.pdf]

Table S3.

| Quantification of apical and basal dendritic branch length in <i>in utero</i> electroporated paired neurons in 300 $\mu\text{m}$ sections. |                                                               |                                         |                |                |                                   |                                         |                |                |
|--------------------------------------------------------------------------------------------------------------------------------------------|---------------------------------------------------------------|-----------------------------------------|----------------|----------------|-----------------------------------|-----------------------------------------|----------------|----------------|
| <u>Individual Paired cell data</u>                                                                                                         | Dendritic length ( $\mu\text{m}$ )                            |                                         |                |                |                                   |                                         |                |                |
|                                                                                                                                            | Basal                                                         |                                         |                |                | Apical                            |                                         |                |                |
|                                                                                                                                            | Total dendritic length per neuron                             | Average branch length per neuron        |                |                | Total dendritic length per neuron | Average branch length per neuron        |                |                |
|                                                                                                                                            |                                                               | Primary                                 | Secondary      | Tertiary       |                                   | Primary                                 | Secondary      | Tertiary       |
| control                                                                                                                                    | 343.5                                                         | 25.1                                    | 27.0           | 27.3           | 694.2                             | 55.6                                    | 29.9           | 40.5           |
| Epac2-RNAi                                                                                                                                 | 261.9                                                         | 29.8                                    | 22.3           | 16.0           | 641.7                             | 52.3                                    | 43.6           | 58.4           |
| control                                                                                                                                    | 598.7                                                         | 13.4                                    | 27.6           | 34.3           | 536.2                             | 23.9                                    | 35.1           | 34.9           |
| Epac2-RNAi                                                                                                                                 | 179.4                                                         | 11.3                                    | 21.7           | 17.7           | 539.2                             | 19.0                                    | 42.6           | 55.7           |
| control                                                                                                                                    | 1218.3                                                        | 25.8                                    | 55.4           | 54.4           | 493.3                             | 45.7                                    | 61.5           | 65.6           |
| Epac2-RNAi                                                                                                                                 | 566.6                                                         | 18.9                                    | 35.2           | 39.7           | 518.8                             | 49.1                                    | 43.4           | 50.9           |
| control                                                                                                                                    | 670.5                                                         | 25.9                                    | 46.3           | 42.2           | 737.9                             | 20.1                                    | 28.8           | 78.0           |
| Epac2-RNAi                                                                                                                                 | 279.9                                                         | 32.2                                    | 35.5           | 30.7           | 494.9                             | 25.6                                    | 23.3           | 55.9           |
| control                                                                                                                                    | 731.3                                                         | 15.8                                    | 48.4           | 55.3           | 914.7                             | 36.4                                    | 29.7           | 50.4           |
| Epac2-RNAi                                                                                                                                 | 415.3                                                         | 16.9                                    | 37.6           | 41.3           | 921.1                             | 43.1                                    | 35.7           | 43.8           |
| <u>Combined data</u>                                                                                                                       | Average dendritic length ( $\mu\text{m}$ ) (mean $\pm$ s.e.m) |                                         |                |                |                                   |                                         |                |                |
|                                                                                                                                            | Basal                                                         |                                         |                |                | Apical                            |                                         |                |                |
|                                                                                                                                            | Average Total dendritic length                                | Average branch length ( $\mu\text{m}$ ) |                |                | Average Total dendritic length    | Average branch length ( $\mu\text{m}$ ) |                |                |
|                                                                                                                                            |                                                               | Primary                                 | Secondary      | Tertiary       |                                   | Primary                                 | Secondary      | Tertiary       |
| control                                                                                                                                    | 712.4 $\pm$ 142.7                                             | 21.2 $\pm$ 2.7                          | 40.9 $\pm$ 5.8 | 42.7 $\pm$ 5.5 | 675.3 $\pm$ 75.5                  | 36.3 $\pm$ 6.6                          | 37.0 $\pm$ 6.2 | 53.9 $\pm$ 7.9 |
| Epac2-RNAi                                                                                                                                 | 340.6 $\pm$ 68.0                                              | 21.8 $\pm$ 3.9                          | 30.4 $\pm$ 3.5 | 29.1 $\pm$ 5.3 | 623.5 $\pm$ 78.6                  | 37.8 $\pm$ 6.5                          | 37.7 $\pm$ 3.9 | 52.9 $\pm$ 2.6 |
